# Supplementary material for: VRK2 identifies a subgroup of primary high-grade astrocytomas with a better prognosis
Source: PubMed Central journal article supplement (PMC3849739; doi:10.1186/1472-6890-13-23), 2013-10-01
Supplement: 1472-6890-13-23-S2.pdf [file 1472-6890-13-23-S2.pdf]

**TABLE S2.** Individual characteristics of all astrocytoma cases. Tumor localization, patient age and sex, genetic information and survival are included.

| Case | Histology              | Tumor location             | Gender | Age | p53 mutation                                   | PTEN Loss | EGFR Gain | IDH1/IDH2 mutation          | MGMT Hypermethylation | Patient status | Overall Survival (months) |
|------|------------------------|----------------------------|--------|-----|------------------------------------------------|-----------|-----------|-----------------------------|-----------------------|----------------|---------------------------|
| 1    | Low-grade Astrocytoma  | Right parietal lobe        | Male   | 39  | No mutation                                    | NA        | No        | No mutation                 | No                    | Dead           | 63,9                      |
| 2    | Low-grade Astrocytoma  | Right parietal lobe        | Male   | 32  | p.His193Arg (c.578A>G)                         | Yes       | No        | IDH1 p.Arg132His (c.395G>A) | No                    | Alive          | 22,3                      |
| 3    | Low-grade Astrocytoma  | Left parietal lobe         | Male   | 29  | p.Arg273Cys (c.817C>T)                         | Yes       | No        | IDH1 p.Arg132His (c.395G>A) | No                    | Alive          | 113,7                     |
| 4    | Low-grade Astrocytoma  | Right frontal lobe         | Male   | 47  | No mutation                                    | NA        | No        | IDH1 p.Arg132His (c.395G>A) | Yes                   | Alive          | 97,9                      |
| 5    | Low-grade Astrocytoma  | Ventricular                | Female | 58  | No mutation                                    | NA        | No        | No mutation                 | No                    | Dead           | 12,8                      |
| 6    | Low-grade Astrocytoma  | Left temporal lobe         | Female | 25  | p.Arg273Cys (c.817C>T)                         | NA        | No        | IDH2 p.Arg172Met (c.515G>T) | No                    | Dead           | 98,9                      |
| 7    | Low-grade Astrocytoma  | Right temporal lobe        | Female | 33  | p.Tyr236Cys (c.707A>G)                         | No        | No        | IDH1 p.Arg132His (c.395G>A) | No                    | Dead           | 57,1                      |
| 8    | Low-grade Astrocytoma  | Right frontal lobe         | Male   | 31  | p.Ile195Thr (c.584T>C)                         | NA        | NA        | IDH1 p.Arg132His (c.395G>A) | No                    | Alive          | 91,3                      |
| 9    | Low-grade Astrocytoma  | Left frontal lobe          | Female | 30  | p.Tyr205Cys (c.614A>G)                         | No        | No        | IDH1 p.Arg132Cys (c.394C>T) | Yes                   | Dead           | 36,2                      |
| 10   | Low-grade Astrocytoma  | Other hemispheric location | Female | 55  | p.Arg175His (c.524G>A)                         | NA        | No        | IDH1 p.Arg132His (c.395G>A) | Yes                   | Dead           | 61,4                      |
| 11   | Low-grade Astrocytoma  | Right frontal lobe         | Male   | 43  | No mutation                                    | NA        | NA        | IDH1 p.Arg132His (c.395G>A) | Yes                   | Alive          | 71,0                      |
| 12   | Low-grade Astrocytoma  | Right temporal lobe        | Female | 35  | p.Arg273Cys (c.817C>T)                         | Yes       | No        | IDH1 p.Arg132His (c.395G>A) | No                    | Dead           | 122,9                     |
| 13   | Low-grade Astrocytoma  | Left frontal lobe          | Male   | 47  | No mutation                                    | No        | No        | IDH1 p.Arg132His (c.395G>A) | Yes                   | Alive          | 129,2                     |
| 14   | Low-grade Astrocytoma  | Left temporal lobe         | Female | 35  | No mutation                                    | NA        | No        | No mutation                 | Yes                   | Alive          | 72,2                      |
| 15   | Low-grade Astrocytoma  | Left temporal lobe         | Female | 35  | NA                                             | No        | No        | NA                          | NA                    | Dead           | 3,0                       |
| 16   | Low-grade Astrocytoma  | Other hemispheric location | Male   | 33  | No mutation                                    | Yes       | No        | No mutation                 | Yes                   | Dead           | 5,3                       |
| 17   | Low-grade Astrocytoma  | Left temporal lobe         | Male   | 52  | p.Arg280Gly (c.838A>G)                         | NA        | No        | IDH1 p.Arg132His (c.395G>A) | Yes                   | Alive          | 34,7                      |
| 18   | Low-grade Astrocytoma  | Right frontal lobe         | Male   | 62  | No mutation                                    | NA        | No        | No mutation                 | Yes                   | Dead           | 4,1                       |
| 19   | Low-grade Astrocytoma  | Right frontal lobe         | Female | 41  | p.Arg273Cys (c.817C>T)                         | NA        | NA        | IDH1 p.Arg132His (c.395G>A) | Yes                   | Alive          | 30,4                      |
| 20   | Low-grade Astrocytoma  | Left temporal lobe         | Male   | 28  | p.Arg175His (c.524G>A); p.Ile195Phe (c.583A>T) | NA        | NA        | IDH1 p.Arg132His (c.395G>A) | Yes                   | Alive          | 64,6                      |
| 21   | Low-grade Astrocytoma  | Other hemispheric location | Male   | 40  | p.Arg273Cys (c.817C>T)                         | NA        | No        | IDH1 p.Arg132His (c.395G>A) | Yes                   | Alive          | 63,7                      |
| 22   | Low-grade Astrocytoma  | Cerebellar hemisphere      | Male   | 15  | No mutation                                    | No        | NA        | No mutation                 | Yes                   | Alive          | 90,0                      |
| 23   | Low-grade Astrocytoma  | Cerebellar vermis          | Female | 17  | No mutation                                    | No        | No        | No mutation                 | No                    | Alive          | 61,8                      |
| 24   | Low-grade Astrocytoma  | Left frontal lobe          | Male   | 29  | No mutation                                    | No        | No        | No mutation                 | Yes                   | Alive          | 53,8                      |
| 25   | Low-grade Astrocytoma  | Other hemispheric location | Male   | 49  | No mutation                                    | No        | No        | No mutation                 | Yes                   | Alive          | 53,5                      |
| 26   | Anaplastic Astrocytoma | Left temporal lobe         | Male   | 63  | No mutation                                    | Yes       | No        | No mutation                 | Yes                   | Dead           | 4,1                       |
| 27   | Anaplastic Astrocytoma | Left occipital lobe        | Male   | 73  | No mutation                                    |           | No        | No mutation                 | Yes                   | Dead           | 12,7                      |
| 28   | Anaplastic Astrocytoma | Right parietal lobe        | Male   | 74  | No mutation                                    | Yes       | No        | No mutation                 | Yes                   | Dead           | 5,2                       |
| 29   | Anaplastic Astrocytoma | Right temporal lobe        | Male   | 48  | No mutation                                    | Yes       | No        | No mutation                 | No                    | Dead           | 15,7                      |
| 30   | Anaplastic Astrocytoma | Left frontal lobe          | Male   | 57  | No mutation                                    | Yes       | Yes       | No mutation                 | No                    | Dead           | 14,0                      |
| 31   | Anaplastic Astrocytoma | Right temporal lobe        | Male   | 55  | No mutation                                    | Yes       | Yes       | No mutation                 | No                    | Alive          | 17,8                      |
| 32   | Anaplastic Astrocytoma | Right occipital lobe       | Female | 47  | No mutation                                    | No        | Yes       | No mutation                 | Yes                   | Dead           | 10,7                      |
| 33   | Anaplastic Astrocytoma | Other hemispheric location | Male   | 45  | No mutation                                    | Yes       | Yes       | No mutation                 | No                    | Dead           | 8,5                       |
| 34   | Anaplastic Astrocytoma | Right frontal lobe         | Female | 55  | No mutation                                    | NA        | Yes       | IDH1 p.Arg132His (c.395G>A) | Yes                   | Dead           | 33,8                      |
| 35   | Anaplastic Astrocytoma | Right temporal lobe        | Male   | 68  | No mutation                                    | NA        | No        | No mutation                 | No                    | Dead           | 13,0                      |
| 36   | Anaplastic Astrocytoma | Right temporal lobe        | Female | 66  | No mutation                                    | NA        | NA        | No mutation                 | No                    | Dead           | 13,6                      |
| 37   | Anaplastic Astrocytoma | Left frontal lobe          | Male   | 66  | p.Arg248Trp (c.742C>T)                         | No        | No        | No mutation                 | Yes                   | Dead           | 17,4                      |
| 38   | Anaplastic Astrocytoma | Right frontal lobe         | Male   | 43  | No mutation                                    | Yes       | Yes       | No mutation                 | No                    | Dead           | 11,6                      |
| 39   | Anaplastic Astrocytoma | Left frontal lobe          | Female | 37  | p.Val197Gly (c.590T>G)                         | NA        | No        | IDH1 p.Arg132His (c.395G>A) | No                    | Dead           | 38,9                      |
| 40   | Anaplastic Astrocytoma | Cerebellar hemisphere      | Male   | 46  | No mutation                                    | No        | No        | No mutation                 | No                    | Dead           | 67,9                      |
| 41   | Anaplastic Astrocytoma | Right frontal lobe         | Female | 55  | No mutation                                    | NA        | Yes       | No mutation                 | No                    | Dead           | 11,4                      |
| 42   | Anaplastic Astrocytoma | Other hemispheric location | Female | 66  | No mutation                                    | Yes       | No        | No mutation                 | No                    | Dead           | 0,5                       |
| 43   | Anaplastic Astrocytoma | Right temporal lobe        | Male   | 73  | No mutation                                    | Yes       | No        | No mutation                 | No                    | Dead           | 3,8                       |
| 44   | Anaplastic Astrocytoma | Cerebellar hemisphere      | Male   | 14  | p.Arg342Stop (c.1024C>T)                       | No        | No        | No mutation                 | No                    | Dead           | 14,4                      |
| 45   | Anaplastic Astrocytoma | Right temporal lobe        | Female | 62  | No mutation                                    | Yes       | No        | No mutation                 | No                    | Dead           | 5,0                       |
| 46   | <i>Glioblastoma</i>    | Right frontal lobe         | Male   | 55  | No mutation                                    | NA        | No        | No mutation                 | No                    | Dead           | 2,1                       |

| Multiforme |                         |                            |        |    |                           |     |     |                             |     |       |       |  |
|------------|-------------------------|----------------------------|--------|----|---------------------------|-----|-----|-----------------------------|-----|-------|-------|--|
| 47         | Glioblastoma Multiforme | Left frontal lobe          | Male   | 54 | No mutation               | No  | No  | IDH1 p.Arg132His (c.395G>A) | Yes | Alive | 137,3 |  |
| 48         | Glioblastoma Multiforme | Right frontal lobe         | Male   | 76 | No mutation               | Yes | No  | No mutation                 | Yes | Dead  | 8,2   |  |
| 49         | Glioblastoma Multiforme | Right frontal lobe         | Male   | 69 | No mutation               | NA  | No  | No mutation                 | NA  | Dead  | 6,9   |  |
| 50         | Glioblastoma Multiforme | Left temporal lobe         | Male   | 45 | No mutation               | No  | No  | No mutation                 | Yes | Dead  | 16,7  |  |
| 51         | Glioblastoma Multiforme | Right frontal lobe         | Female | 60 | No mutation               | Yes | Yes | No mutation                 | Yes | Alive | 14,7  |  |
| 52         | Glioblastoma Multiforme | Right frontal lobe         | Male   | 64 | No mutation               | NA  | NA  | No mutation                 | Yes | Dead  | 11,5  |  |
| 53         | Glioblastoma Multiforme | Left frontal lobe          | Male   | 71 | NA                        | Yes | No  | NA                          | Yes | Alive | 21,9  |  |
| 54         | Glioblastoma Multiforme | Right temporal lobe        | Male   | 70 | p.Arg273His (c.818G>A)    | NA  | NA  | No mutation                 | Yes | Dead  | 2,7   |  |
| 55         | Glioblastoma Multiforme | Right occipital lobe       | Male   | 72 | No mutation               | NA  | No  | No mutation                 | No  | Dead  | 8,4   |  |
| 56         | Glioblastoma Multiforme | Right frontal lobe         | Female | 79 | p.Thr256Ile (c.767C>T)    | NA  | NA  | No mutation                 | No  | Dead  | 1,6   |  |
| 57         | Glioblastoma Multiforme | Left parietal lobe         | Male   | 64 | No mutation               | NA  | Yes | No mutation                 | No  | Dead  | 22,5  |  |
| 58         | Glioblastoma Multiforme | Right occipital lobe       | Female | 71 | No mutation               | Yes | Yes | No mutation                 | Yes | Alive | 10,1  |  |
| 59         | Glioblastoma Multiforme | Left frontal lobe          | Male   | 51 | No mutation               | Yes | Yes | No mutation                 | No  | Dead  | 16,9  |  |
| 60         | Glioblastoma Multiforme | Left frontal lobe          | Female | 59 | No mutation               | No  | Yes | No mutation                 | Yes | Dead  | 29,5  |  |
| 61         | Glioblastoma Multiforme | Other hemispheric location | Female | 49 | No mutation               | NA  | NA  | No mutation                 | No  | Dead  | 9,8   |  |
| 62         | Glioblastoma Multiforme | Other hemispheric location | Male   | 34 | p.Arg196Stop (c.586C>T)   | No  | No  | No mutation                 | Yes | Dead  | 0,7   |  |
| 63         | Glioblastoma Multiforme | Right frontal lobe         | Male   | 66 | c.673-1G>A                | No  | No  | No mutation                 | Yes | Dead  | 24,6  |  |
| 64         | Glioblastoma Multiforme | Right parietal lobe        | Male   | 56 | NA                        | Yes | Yes | NA                          | NA  | Dead  | 14,2  |  |
| 65         | Glioblastoma Multiforme | Right parietal lobe        | Male   | 55 | p.Leu257Val (c.769C>G)    | NA  | No  | No mutation                 | Yes | Dead  | 8,0   |  |
| 66         | Glioblastoma Multiforme | Left parietal lobe         | Male   | 52 | No mutation               | Yes | Yes | No mutation                 | No  | Dead  | 16,9  |  |
| 67         | Glioblastoma Multiforme | Right temporal lobe        | Female | 51 | p.Asn131del (c.391delAAC) | Yes | No  | No mutation                 | No  | Dead  | 6,7   |  |
| 68         | Glioblastoma Multiforme | Right temporal lobe        | Male   | 55 | No mutation               | NA  | No  | No mutation                 | Yes | Dead  | 0,3   |  |
| 69         | Glioblastoma Multiforme | Cerebellar vermis          | Female | 52 | No mutation               | Yes | No  | No mutation                 | Yes | Dead  | 29,1  |  |
| 70         | Glioblastoma Multiforme | Right occipital lobe       | Female | 67 | No mutation               | Yes | NA  | No mutation                 | No  | Dead  | 9,8   |  |
| 71         | Glioblastoma Multiforme | Left temporal lobe         | Male   | 65 | p.Val147Asp (c.440T>A)    | Yes | No  | No mutation                 | No  | Dead  | 5,6   |  |
| 72         | Glioblastoma Multiforme | Left parietal lobe         | Male   | 70 | No mutation               | Yes | No  | No mutation                 | Yes | Dead  | 8,0   |  |
| 73         | Glioblastoma Multiforme | Right temporal lobe        | Male   | 76 | No mutation               | No  | Yes | No mutation                 | Yes | Dead  | 5,6   |  |
| 74         | Glioblastoma Multiforme | Right temporal lobe        | Male   | 67 | NA                        | Yes | No  | NA                          | No  | Dead  | 4,1   |  |
| 75         | Glioblastoma Multiforme | Right occipital lobe       | Female | 73 | No mutation               | NA  | No  | No mutation                 | Yes | Dead  | 8,7   |  |
| 76         | Glioblastoma Multiforme | Right temporal lobe        | Female | 70 | No mutation               | Yes | No  | No mutation                 | No  | Dead  | 18,8  |  |
| 77         | Glioblastoma Multiforme | Left temporal lobe         | Male   | 43 | No mutation               | No  | Yes | No mutation                 | Yes | Dead  | 8,3   |  |
| 78         | Glioblastoma Multiforme | Left temporal lobe         | Female | 67 | p.Ser241Phe (c.722C>T)    | Yes | No  | No mutation                 | No  | Dead  | 5,9   |  |
| 79         | Glioblastoma Multiforme | Right temporal lobe        | Male   | 62 | No mutation               | No  | No  | No mutation                 | No  | Dead  | 0,2   |  |
| 80         | Glioblastoma Multiforme | Right temporal lobe        | Female | 66 | No mutation               | Yes | No  | No mutation                 | No  | Dead  | 20,7  |  |
| 81         | Glioblastoma Multiforme | Right occipital lobe       | Male   | 69 | NA                        | Yes | Yes | NA                          | No  | Dead  | 20,4  |  |
| 82         | Glioblastoma Multiforme | Left temporal lobe         | Male   | 48 | No mutation               | No  | No  | No mutation                 | Yes | Dead  | 7,4   |  |
| 83         | Glioblastoma Multiforme | Right frontal lobe         | Female | 74 | NA                        | Yes | No  | NA                          | NA  | Dead  | 12,3  |  |
| 84         | Glioblastoma Multiforme | Right temporal lobe        | Female | 63 | p.Ile255Thr (c.764T>C)    | No  | Yes | No mutation                 | No  | Dead  | 8,8   |  |
| 85         | Glioblastoma Multiforme | Right temporal lobe        | Male   | 68 | No mutation               | No  | Yes | No mutation                 | Yes | Dead  | 10,2  |  |
| 86         | Glioblastoma Multiforme | Right frontal lobe         | Female | 69 | No mutation               | No  | Yes | No mutation                 | Yes | Dead  | 14,9  |  |
| 87         | Glioblastoma Multiforme | Left temporal lobe         | Female | 35 | No mutation               | Yes | Yes | No mutation                 | Yes | Dead  | 10,1  |  |
| 88         | Glioblastoma Multiforme | Left temporal lobe         | Male   | 72 | p.Met237Ile (c.711G>A)    | NA  | NA  | No mutation                 | Yes | Dead  | 11,7  |  |
| 89         | Glioblastoma Multiforme | Right frontal lobe         | Male   | 62 | No mutation               | Yes | No  | No mutation                 | Yes | Dead  | 12,7  |  |
| 90         | Glioblastoma Multiforme | Left temporal lobe         | Male   | 61 | No mutation               | Yes | Yes | No mutation                 | No  | Dead  | 13,8  |  |
| 91         | Glioblastoma Multiforme | Left temporal lobe         | Female | 27 | No mutation               | NA  | NA  | No mutation                 | No  | Dead  | 101,5 |  |
| 92         | Glioblastoma Multiforme | Right frontal lobe         | Female | 67 | NA                        | NA  | NA  | NA                          | No  | Dead  | 14,6  |  |
| 93         | Glioblastoma Multiforme | Left frontal lobe          | Male   | 54 | p.Arg290His (c.869G>A)    | Yes | No  | No mutation                 | Yes | Dead  | 9,2   |  |
| 94         | Glioblastoma Multiforme | Left frontal lobe          | Male   | 59 | No mutation               | Yes | Yes | No mutation                 | No  | Dead  | 6,4   |  |
| 95         | Glioblastoma Multiforme | Right temporal lobe        | Male   | 69 | No mutation               | Yes | No  | No mutation                 | No  | Dead  | 16,0  |  |
| 96         | Glioblastoma Multiforme | Right frontal lobe         | Male   | 72 | No mutation               | No  | No  | No mutation                 | No  | Dead  | 13,3  |  |

|     |                         |                            |        |    |                        |     |     |             |     |       |      |
|-----|-------------------------|----------------------------|--------|----|------------------------|-----|-----|-------------|-----|-------|------|
| 97  | Glioblastoma Multiforme | Right parietal lobe        | Female | 69 | No mutation            | Yes | No  | No mutation | Yes | Dead  | 3,6  |
| 98  | Glioblastoma Multiforme | Other hemispheric location | Male   | 65 | No mutation            | NA  | No  | No mutation | No  | Dead  | 13,7 |
| 99  | Glioblastoma Multiforme | Other hemispheric location | Female | 72 | No mutation            | Yes | Yes | No mutation | Yes | Dead  | 18,4 |
| 100 | Glioblastoma Multiforme | Right temporal lobe        | Male   | 61 | No mutation            | Yes | No  | No mutation | No  | Alive | 4,8  |
| 101 | Glioblastoma Multiforme | Left temporal lobe         | Female | 64 | p.Arg156Gly (c.466C>G) | No  | No  | No mutation | No  | Dead  | 7,0  |
| 102 | Glioblastoma Multiforme | Left frontal lobe          | Female | 55 | No mutation            | Yes | No  | No mutation | Yes | Dead  | 11,0 |
| 103 | Glioblastoma Multiforme | Right temporal lobe        | Male   | 53 | No mutation            | No  | No  | No mutation | No  | Dead  | 7,8  |
| 104 | Glioblastoma Multiforme | Left frontal lobe          | Female | 68 | p.Arg282Trp (c.844C>T) | Yes | No  | No mutation | Yes | Dead  | 22,7 |
| 105 | Glioblastoma Multiforme | Right frontal lobe         | Male   | 57 | p.Asp259Val (c.776A>T) | NA  | No  | No mutation | Yes | Alive | 59,1 |
