# Supplementary material for: VRK2 identifies a subgroup of primary high-grade astrocytomas with a better prognosis
Source: PubMed Central journal article supplement (PMC3849739; doi:10.1186/1472-6890-13-23), 2013-10-01
Supplement: 1472-6890-13-23-S3.pdf [file 1472-6890-13-23-S3.pdf]

Table S3.

Sequence of primers used for detection of mutations in *p53* and *IDH1/2* genes.

| <b>Primer Name</b> | <b>Primer sequences 5'-3'</b> |
|--------------------|-------------------------------|
| p53 exon 1 F       | GCTCAAGACTGGCGCTAAAA          |
| p53 exon 1 R       | GTGACTCAGAGAGGACTCAT          |
| p53 exon 2 F       | GAAGCAGCCATTCTTTTCCT          |
| p53 exon 2 R       | GGTCCCCAGCCCAACCCTT           |
| p53 exon 3 F       | GGAGCCGCAGTCAGATCCTA          |
| p53 exon 3 R       | GGTCCCCAGCCCAACCCTT           |
| p53 exon 4 F       | CAACGTTCTGGTAAGGACAA          |
| p53 exon 4 R       | GCCAGGCATTGAAGTCTCAT          |
| p53 exon 5 F       | GCCGTGTTCCAGTTGCTTTA          |
| p53 exon 5 R       | AGGAGGGGCCAGACCTAAGA          |
| p53 exon 6 F       | AGCGCTGCTCAGATAGCGAT          |
| p53 exon 6 R       | TAAGCAGCAGGAGAAAGCCC          |
| p53 exon 7 F       | AAGGCGCACTGGCCTCATCTT         |
| p53 exon 7 R       | GAGGTGGATGGGTAGTAG            |
| p53 exon 8 F       | GACCTGATTCCTTACTGCCT          |
| p53 exon 8 R       | TCTCCTCCACCGCTTCTT            |
| p53 exon 9 F       | GGAGACCAAGGGTGCAGTAT          |
| p53 exon 9 R       | GCCCCAATTGCAGGTAAAAC          |
| p53 exon 10 F      | GGTACTTGAAGTGCAGTTTCT         |
| p53 exon 10 R      | CAGCTGCCTTTGACCATGAA          |
| p53 exon 11 F      | CCAGCCTTAGGCCCTTCAA           |
| p53 exon 11 R      | TGTCAGTGGGGAACAAGAA           |
| IDH1 exon 4 F      | CGGTCTTCAGAGAAGCCATT          |
| IDH1 exon 4 R      | CACATTATTGCCAACATGAC          |
| IDH2 exon 4 F      | GATGGCGGCTGCAGTGGGACC         |
| IDH2 exon 4 R      | TAGGCCAGGAGCTCCAGTCG          |

F: forward, R: reverse.
