# Supplementary material for: VRK2 identifies a subgroup of primary high-grade astrocytomas with a better prognosis
Source: PubMed Central journal article supplement (PMC3849739; doi:10.1186/1472-6890-13-23), 2013-10-01
Supplement: 1472-6890-13-23-S4.pdf [file 1472-6890-13-23-S4.pdf]

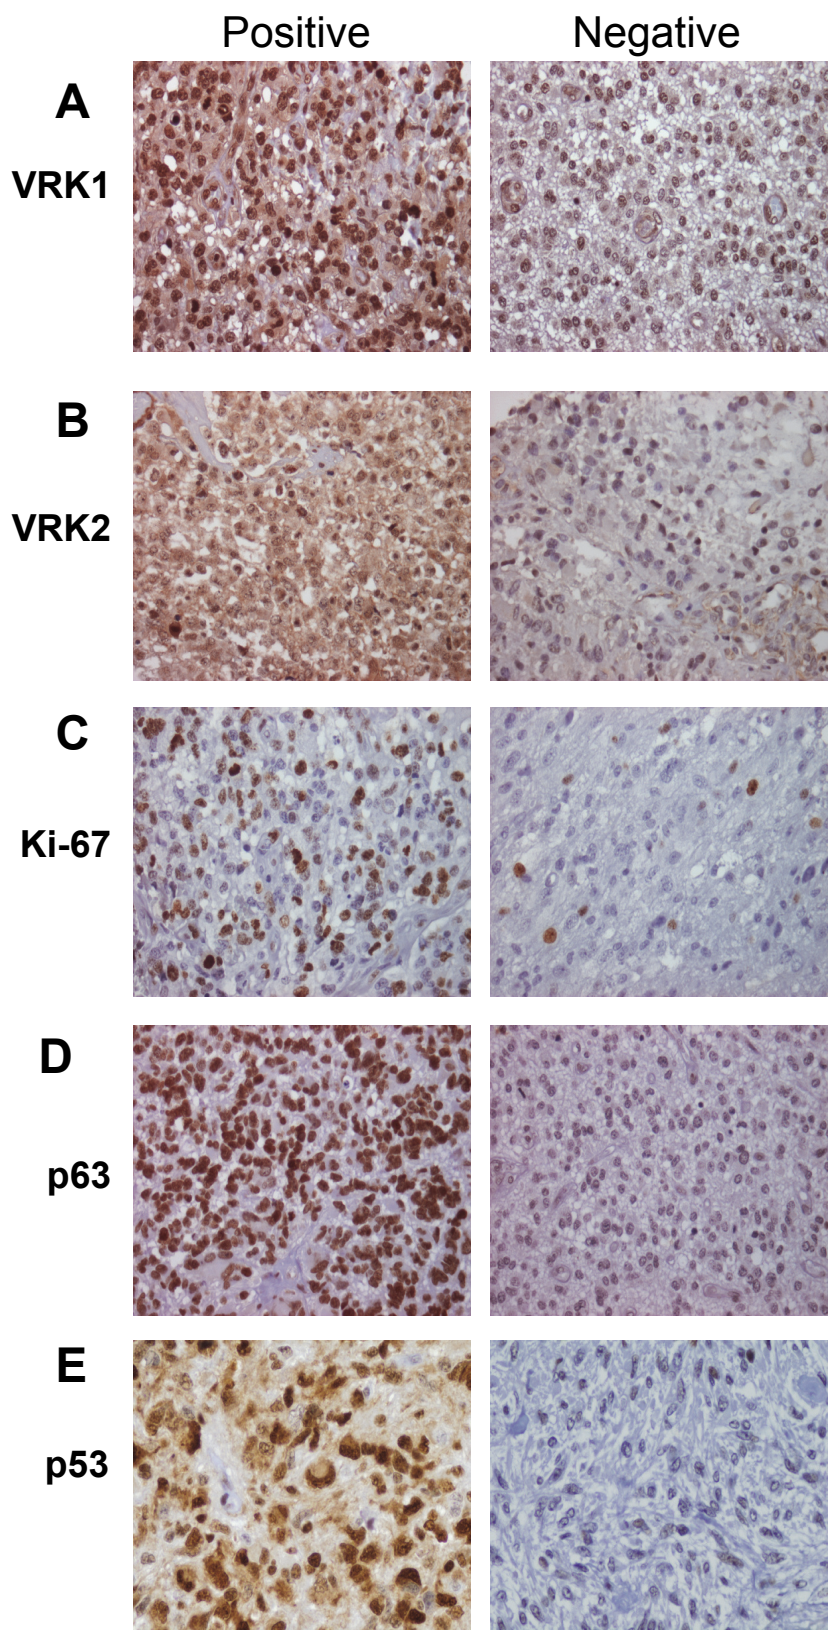

**Figure S1.** Expression level of different proteins by immunohistochemistry to show cases considered to be either positive (left column) or negative (right column) expressing VRK1, VRK2, p63, Ki-67 and p53 in glioblastomas. Images taken with at x400 magnification..
